# Supplementary material for: Celebrity Suicide of a Pre-World War I Spy
Source: Atypon-hosted journal article supplement (doi:10.1027/0227-5910/a000762), 2021-02-10

*Electronic Supplementary Material 1*

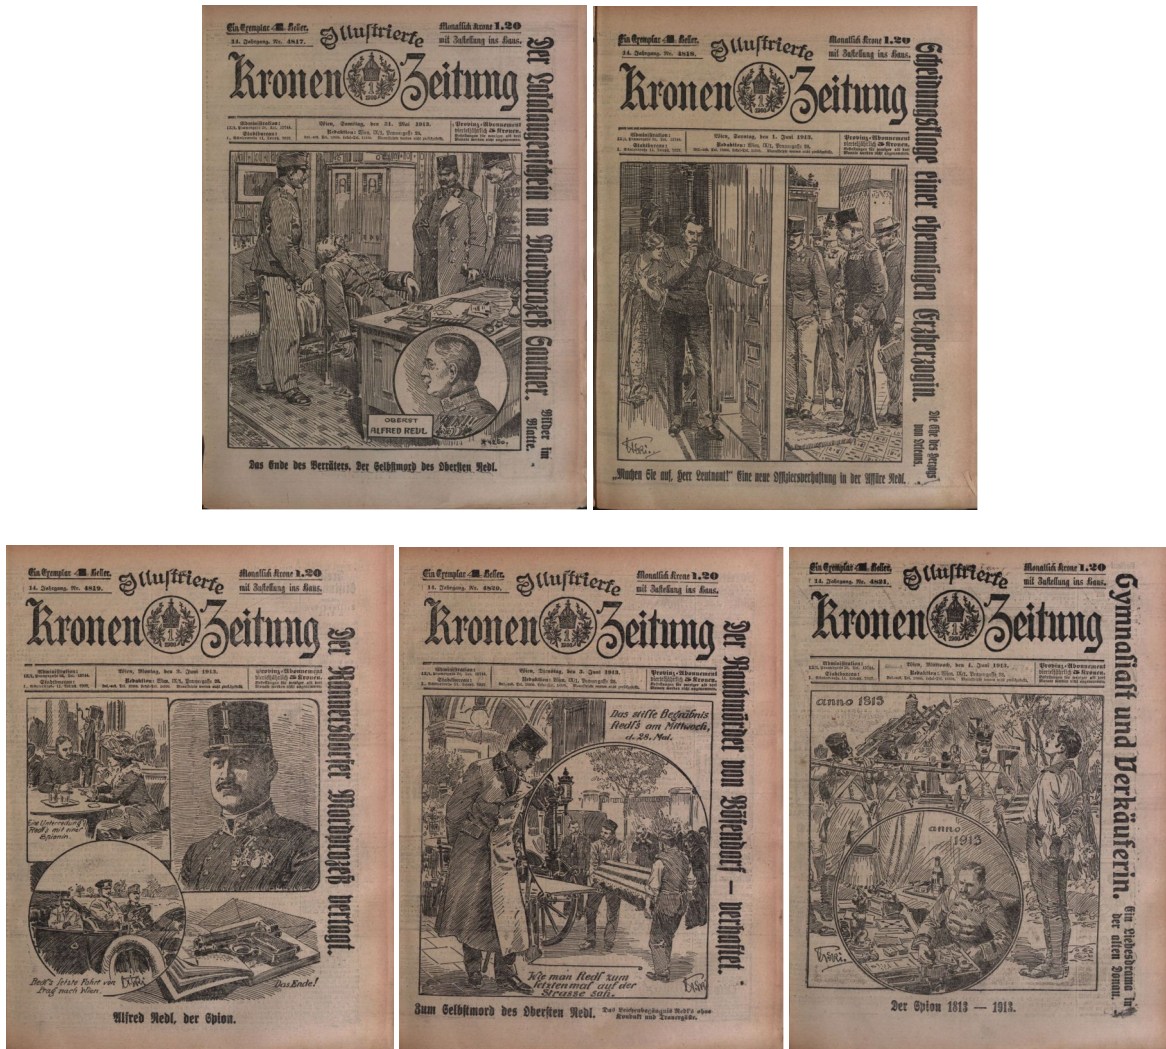

Figure. Example of the front pages of one of the leading newspapers of that time (*Illustrierte Kronen Zeitung*) on five consecutive days (March 31 to June 4) that all provide illustrations of the “Redl affair.” The illustrations tell a vivid story of Redl’s suicide and the affair (e.g., the headline on March 31: “The End of the Traitor: The Suicide of Colonel Redl”), including depictions of the suicide method (e.g., an illustration of a gun on June 2). It was a big story that continued inside the newspaper. Afterwards, media attention remained high for many days and only faded slowly with time.

*Figure.* Example of one page of the civil death register handwritten in “Kurrent,” including one firearm suicide (“Selbstmord durch Erschießen”).

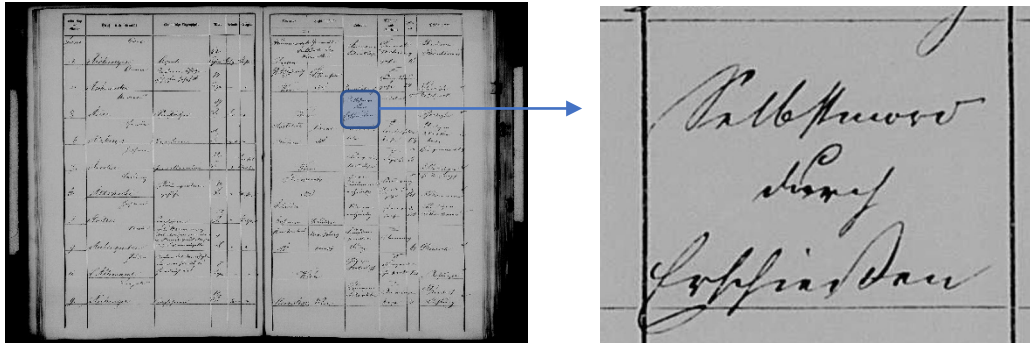

Supplement: 0227-5910_a000762_esm1.pdf [file 0227-5910_a000762_esm1.pdf]
